# Supplementary material for: Geranylgeraniol Overcomes the Deleterious Effect of Nitrogen Containing Bisphosphonates on Osteoclasts by Promoting G-protein Expression
Source: Research Square preprint supplement (doi:10.21203/rs.3.rs-6263042/v1), 2025-06-20
Supplement: Supplementary file 1 [file 482e1c951e80288a76930472.docx]

**Fig. s1. The mevalonate pathway and the possible downstream effects of nitrogen containing bisphosphonates**. The figure shows that NBP inhibits farnesyl diphosphate synthase (FDPS) leading to the subsequent decrease in G protein prenylation. Addition of GGOH downstream of FDPS reverses this inhibition. Farnesylation and prenylation of the gamma G protein subunit is depicted by the purple ovals showing 15 and 20 carbon chain backbones (denoted by Y’s) linked to a terminal sulfur atom (S) in the cysteine residue of the gamma subunit. Without prenylation of G proteins, osteoclasts undergo apoptosis putatively leading to disrupted bone homeostasis, inflammation and bone necrosis. Other effects of NBP induced FDPS inhibition occur upstream and include a switch to anaerobic metabolism, bone necrosis and MRONJ.
